# Supplementary material for: Digestion under saliva, simulated gastric and small intestinal conditions and fermentation in vitro of polysaccharides from the flowers of Camellia sinensis induced by human gut microbiota
Source: Royal Society of Chemistry journal article supplement (doi:10.1039/c7fo01024a), 2017-01-01
Supplement: c7fo01024a3.pdf [file c7fo01024a3.pdf]

1 **Digestion under saliva, simulated gastric and small intestinal conditions and**  
2 **fermentation *in vitro* induced by human gut microbiota of polysaccharides from**  
3 **the flowers of *Camellia sinensis***

4 Dan Chen <sup>a</sup>, Guijie Chen <sup>a</sup>, Peng Wan <sup>a</sup>, Bing Hu <sup>a</sup>, Ligen Chen <sup>b</sup>, Shiyi Ou <sup>c</sup>,  
5 Xiaoxiong Zeng <sup>a,\*</sup>, Hong Ye <sup>a,\*</sup>

6 <sup>a</sup> College of Food Science and Technology, Nanjing Agricultural University, Nanjing  
7 210095, Jiangsu, China

8 <sup>b</sup> Jiangsu Key Laboratory of Biochemistry and Biotechnology of Marine Wetland,  
9 Yancheng Institute of Technology, Yancheng 224051, Jiangsu, China

10 <sup>c</sup> Department of Food Science and Engineering, Jinan University, Guangzhou 510632,  
11 Guangdong, China

---

\*To whom correspondence should be addressed. Tel & Fax: +86 25 84396791; E-mail: [zengxx@njau.edu.cn](mailto:zengxx@njau.edu.cn) (X. Zeng),  
[yehong@njau.edu.cn](mailto:yehong@njau.edu.cn) (H. Ye)

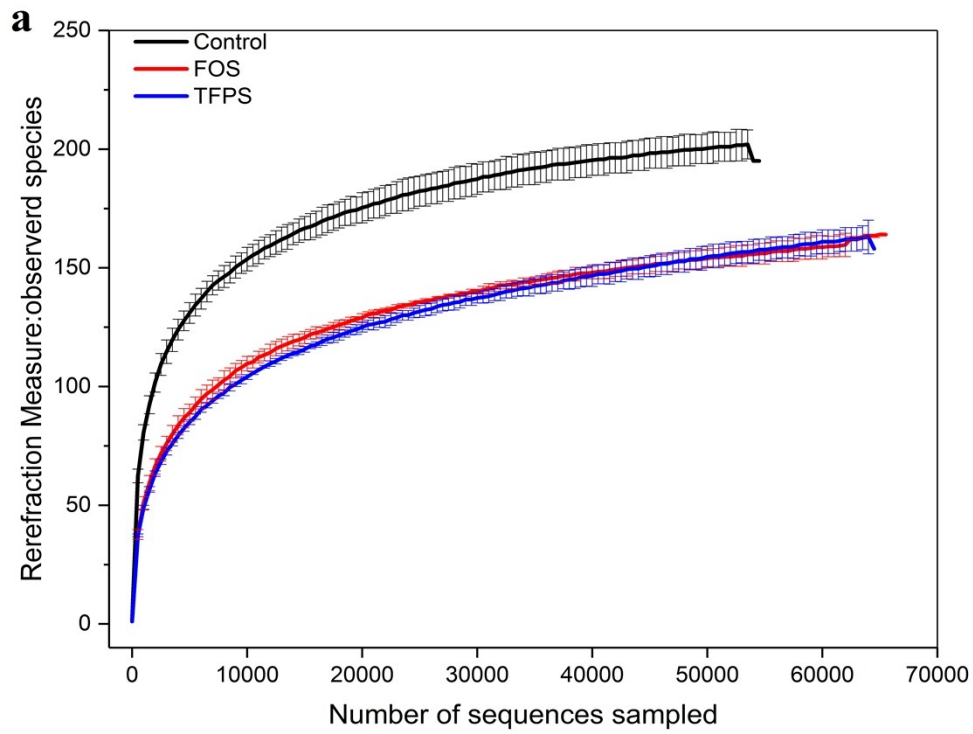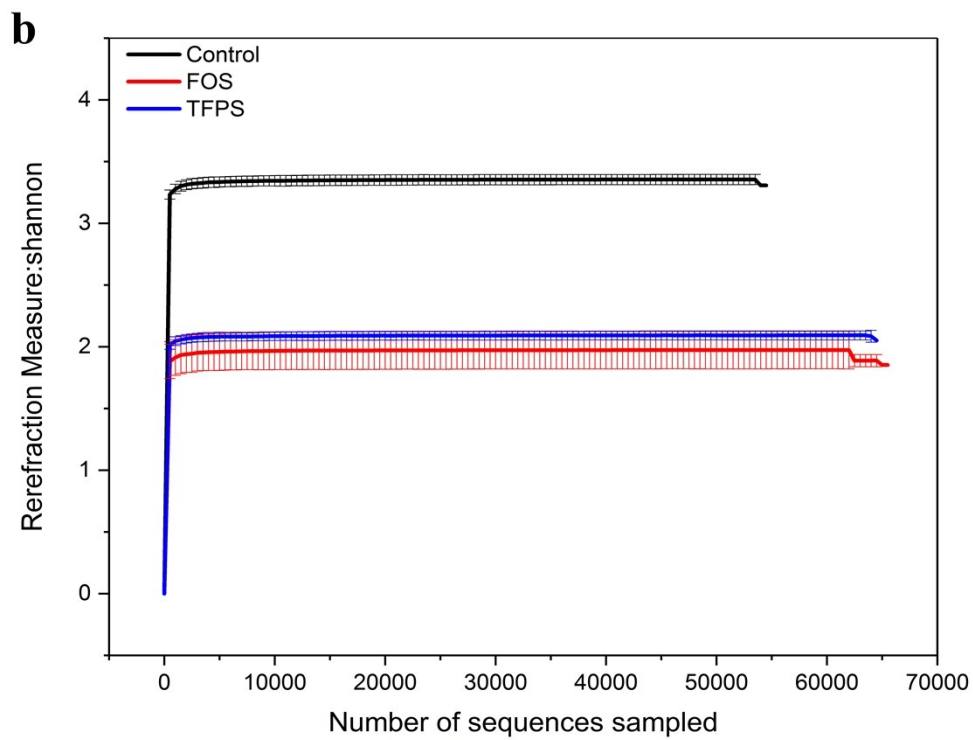

**Supplementary Fig. 1. Alpha diversity indices of different treated microbiota.**

Observed species (**a**) and shannon (**b**) of fecal samples from TFPS, FOS, Control fermentation ( $n = 3$  for each group). Mean  $\pm$  Standard deviations are shown.
